# Supplementary material for: Development of a Viral-Like Particle Candidate Vaccine Against Novel Variant Infectious Bursal Disease Virus
Source: PubMed Central journal article supplement (PMC7916800; doi:10.3390/vaccines9020142), 2021-02-10
Supplement: vaccines-09-00142-s001.pdf [file vaccines-09-00142-s001.pdf]

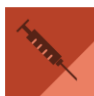

| Strain            | phenotype | GenBank No. | VP2 |     |     |     |     |     |     |     |     |     |     |     |     |     |     |     |     |
|-------------------|-----------|-------------|-----|-----|-----|-----|-----|-----|-----|-----|-----|-----|-----|-----|-----|-----|-----|-----|-----|
|                   |           |             | 213 | 221 | 222 | 242 | 249 | 252 | 253 | 254 | 256 | 279 | 284 | 286 | 294 | 299 | 318 | 323 | 330 |
| SHG19             | nVarIBDV  | MH879092    | N   | K   | T   | V   | K   | I   | Q   | N   | V   | N   | A   | I   | L   | S   | D   | E   | S   |
| SHG352            | nVarIBDV  | MT179720    | *   | *   | *   | *   | *   | *   | *   | *   | *   | *   | *   | *   | *   | *   | *   | *   | *   |
| Variant E USA     | VarIBDV   | AF133904    | *   | Q   | *   | *   | *   | V   | *   | S   | *   | *   | *   | *   | *   | N   | *   | *   | *   |
| 9109 USA          | VarIBDV   | AY462027    | *   | Q   | *   | *   | *   | V   | *   | *   | *   | *   | *   | *   | *   | N   | N   | D   | *   |
| Variant A USA     | VarIBDV   | M64285      | D   | Q   | Q   | *   | *   | V   | *   | S   | *   | *   | *   | *   | *   | N   | *   | D   | *   |
| GLS USA           | VarIBDV   | AY368653    | D   | Q   | *   | *   | *   | V   | *   | S   | *   | *   | *   | T   | *   | N   | G   | D   | *   |
| BD399 Bangladesh  | vvIBDV    | AF362776    | D   | Q   | A   | I   | Q   | V   | *   | G   | I   | D   | *   | T   | I   | *   | G   | D   | *   |
| HK46 China        | vvIBDV    | AF092943    | D   | Q   | A   | I   | Q   | V   | *   | G   | I   | D   | *   | T   | I   | *   | G   | D   | *   |
| UK661 France      | vvIBDV    | NC-004178   | D   | Q   | A   | I   | Q   | V   | *   | G   | I   | D   | *   | T   | I   | *   | G   | D   | *   |
| D6948 Netherlands | vvIBDV    | AF240686    | D   | Q   | A   | I   | Q   | V   | *   | G   | I   | D   | *   | T   | I   | *   | G   | D   | *   |
| YS07 China        | vvIBDV    | FJ695138    | D   | Q   | A   | I   | Q   | V   | *   | G   | I   | D   | *   | T   | I   | *   | G   | D   | *   |
| OKYM Japan        | vvIBDV    | D49706      | D   | Q   | A   | I   | Q   | V   | *   | G   | I   | D   | *   | T   | I   | *   | G   | D   | *   |
| IM USA            | cIBDV     | AY029166    | D   | Q   | P   | I   | Q   | V   | *   | G   | *   | D   | *   | T   | *   | N   | G   | D   | *   |
| F52/70 France     | cIBDV     | HG974565    | D   | Q   | P   | I   | Q   | V   | *   | G   | *   | *   | *   | T   | *   | N   | G   | D   | *   |

1
